# Short report: How often do UK primary care trials face recruitment delays?

Peter Bower<sup>a</sup>, Sue Wilson<sup>b</sup> and Nigel Mathers<sup>c</sup>

Bower P, Wilson S and Mathers N. How often do UK primary care trials face recruitment delays? *Family Practice* 2007; **24**: 601–603.

Recruitment to trials is often viewed as problematic but data are scarce. This study surveyed authors of published primary care trials to assess the scale of recruitment problems. Seventy trial authors were surveyed with a response rate of 56%. Less than one-third of trials recruited to their original timescale. Recruitment requiring GPs to gain patient consent was significantly associated with recruitment problems. The data may be useful in the wider drive to improve recruitment in primary care.

**Keywords.** Randomized controlled trials, recruitment.

## Introduction

Trials need sufficient patients to ensure statistical power and validity, but recruitment remains problematic.<sup>1</sup> A previous study of UK trials found that less than one-third recruited to target, but reported few significant factors associated with success.<sup>2</sup> Although recruitment in primary care is always viewed as a particular challenge, data concerning the exact magnitude of difficulties are scarce.

We surveyed authors of published trials to examine:

- (a) the extent of recruitment difficulties;
- (b) responses to recruitment problems; and
- (c) the relationship between trial characteristics and recruitment.

## Methods

We identified randomized trials through an online search of three medical journals which publish primary care trials routinely (*British Medical Journal*, *Family Practice* and *British Journal of General Practice*) and included trials from UK primary care requiring individual patient consent, published during 2000–2005.

We emailed a questionnaire to the corresponding authors, with two reminders. Where authors had published more than one eligible trial, we chose one randomly.

Analysis was largely descriptive. We identified potential predictors of recruitment success from a previous study (see Table 1).<sup>3</sup> Factors associated with recruitment success were analysed using cross-tabulations, comparing study characteristics with a dichotomous measure of recruitment ‘success’ (defined as recruiting to time or overrunning by less than 50% of the planned time).

## Results

We identified 213 trials and excluded 125 trials on one or more exclusion criteria: outside the UK ( $n = 71$ ); no patient consent ( $n = 45$ ) and not in general practice ( $n = 36$ ). We removed 18 trials by the same author, leaving 70 eligible, and the response rate was 56% overall ( $n = 39$ ), although data on the main dependent variable was reported for 34. Responders were involved in larger trials, although the difference was not significant (mean difference 399, 95% confidence interval  $-214$  to  $1011$ ). Table 1 shows key trial characteristics.

Received 19 February 2007; Revised 21 June 2007; Accepted 9 July 2007.

<sup>a</sup>National Primary Care Research and Development Centre, University of Manchester, Manchester, <sup>b</sup>Department of Primary Care & General Practice, University of Birmingham, Birmingham and <sup>c</sup>Institute of General Practice and Primary Care, University of Sheffield, Sheffield, UK. Correspondence to Peter Bower, National Primary Care Research and Development Centre, University of Manchester, Manchester M13 9PL, UK; Email: p.bower@manchester.ac.uk

TABLE 1 *Trials organizational characteristic and associations with recruitment (n = 34)*

| Theme                                  | Characteristic                                                    | n (%)    | Percentage recruiting within 50% of planned duration |
|----------------------------------------|-------------------------------------------------------------------|----------|------------------------------------------------------|
| Planning                               | Piloted recruitment methods                                       | 15 (44)  | 47                                                   |
|                                        | No pilot                                                          | 19 (56)  | 53                                                   |
|                                        | 'Rescue' plan in case of poor recruitment                         | 12 (35)  | 42                                                   |
|                                        | 'No rescue plan'                                                  | 22 (65)  | 55                                                   |
| Experience                             | Principal investigator conducted previous trials in primary care  | 28 (82)  | 50                                                   |
|                                        | No previous trials                                                | 6 (18)   | 50                                                   |
|                                        | Principal investigator conducted previous trials in clinical area | 18 (53)  | 50                                                   |
|                                        | No previous trials                                                | 16 (47)  | 50                                                   |
| Methods for identifying patients       | Primary care professional                                         | 15 (44)  | 53                                                   |
|                                        | Other                                                             | 19 (56)  | 47                                                   |
|                                        | Systematic identification from practice records                   | 14 (41)  | 50                                                   |
|                                        | Other                                                             | 20 (59)  | 50                                                   |
|                                        | Screening in the waiting room                                     | 3 (9)    | 0                                                    |
|                                        | Other                                                             | 31 (91)  | 55                                                   |
|                                        | Advertisement in practices                                        | 8 (24)   | 38                                                   |
|                                        | Other                                                             | 26 (76)  | 54                                                   |
| Workload of primary care professionals | Patients identified by the primary care professional              | 15 (44)  | 53                                                   |
|                                        | Other                                                             | 19 (56)  | 47                                                   |
|                                        | Consent taken by the primary care professional                    | 8 (24)   | 13                                                   |
|                                        | Other                                                             | 26 (76)  | 62                                                   |
|                                        | Patients randomized by the primary care professional              | 9 (27)   | 33                                                   |
|                                        | Other                                                             | 25 (73)  | 56                                                   |
|                                        | Study investigation by the primary care professional              | 14 (41)  | 43                                                   |
|                                        | Other                                                             | 20 (59)  | 55                                                   |
| Networks                               | Study used local primary care research networks                   | 10 (29)  | 40                                                   |
|                                        | Did not use networks                                              | 24 (71)  | 54                                                   |
| Methods of improving recruitment       | Academic GPs on the research team                                 | 29 (85)  | 52                                                   |
|                                        | No academic GP                                                    | 5 (15)   | 40                                                   |
|                                        | Other primary care academics on the research team                 | 14 (41)  | 43                                                   |
|                                        | No primary care academic                                          | 20 (59)  | 55                                                   |
|                                        | Patient representative on the research team                       | 3 (9)    | 67                                                   |
|                                        | No patient representative                                         | 31 (91)  | 48                                                   |
|                                        | 'Local opinion leader' on the research team                       | 17 (50)  | 47                                                   |
|                                        | No local opinion leader                                           | 17 (50)  | 53                                                   |
|                                        | Financial incentive for professionals                             | 11 (32)  | 46                                                   |
|                                        | No financial incentives                                           | 23 (68)  | 52                                                   |
|                                        | Educational incentives for professionals                          | 8 (24)   | 38                                                   |
|                                        | No educational incentives                                         | 26 (76)  | 54                                                   |
|                                        | Interventions not accessible outside trial                        | 19 (56)  | 58                                                   |
|                                        | Not accessible                                                    | 15 (44)  | 40                                                   |
|                                        | Financial incentives for patients                                 | 0 (0)    | NA                                                   |
|                                        | No financial incentives                                           | 34 (100) |                                                      |
|                                        | Newsletters and direct mailings about recruitment                 | 17 (50)  | 41                                                   |
|                                        | None                                                              | 17 (50)  | 59                                                   |
|                                        | In-person reminders about recruitment                             | 20 (59)  | 40                                                   |
|                                        | None                                                              | 14 (41)  | 64                                                   |
| Feedback on actual recruitment rates   | 20 (59)                                                           | 40       |                                                      |
| None                                   | 14 (41)                                                           | 64       |                                                      |

NA, not applicable.

- (a) Extent of recruitment difficulties—the mean planned sample size was 1086 patients (SD 1562), and planned recruitment duration was 12 months (SD 8.3, range 1–36). The mean achieved sample size was 1002 (SD 1585). Ten trials (29%) recruited to timetable, 12 (35%) required up to 50% greater time than planned and 12 (35%) required over 50% additional time.
- (b) Responses to recruitment problems—these included extending the recruitment period (56%); seeking additional funds (31%); introducing other recruitment methods (18%); increasing the number of sites (44%); recalculating power (21%) and finishing with insufficient patients (18%).
- (c) The relationship between trial characteristics and recruitment—17 (50%) trials recruited to time or overran by less than 50%. One variable was statistically associated with recruitment duration. If GPs were responsible for gaining patient consent, only 12.5% of trials recruited within 50% of the planned time, compared with

61.5%, where the GP was not responsible ( $\chi^2 = 5.89$ , d.f. = 1,  $P = 0.04$ ).

## Discussion

Our restriction to published studies means that the results cannot be representative of all trials and are likely to overestimate the effectiveness of recruitment. The response rate was poor, and limiting the inclusion of more prolific and successful trial authors may overestimate recruitment difficulties. Cross-sectional associations cannot determine cause–effect relationships, and the data were restricted to self-report. The analysis of factors associated with recruitment had low power, and some important factors (e.g. the type of disorder or intervention) were not tested. Furthermore, it is difficult to distinguish cause from effect, as trials may adopt methods because of poor recruitment, rather than those methods causing recruitment problems. However, the finding that GPs gaining patient consent is associated with recruitment problems supports the previous findings.<sup>1</sup> Clearly, a larger study using prospective data collection from a trial register is indicated.

Despite these limitations, the results do provide an estimate of the range of delays in primary care trials. Clearly, trials running past their planned recruitment timetable are the norm, and one-third of the published trials were forced to seek additional funds. This has clear implications for both funders and grant applicants.

There is a small but emerging literature on determinants of recruitment.<sup>2,4</sup> If the potential of UK primary care as a platform for high-quality trials is to be realized, there is a need to consider a range of potential interventions and begin a programme of work to test and disseminate different recruitment methods.

## Acknowledgements

The work was carried out on behalf of The Royal College of General Practitioners Research Group.

## Declaration

Ethical approval: None.

Conflicts of interest: None.

## References

- <sup>1</sup> Fairhurst K, Dowrick C. Problems with recruitment in a randomised controlled trial of counselling in general practice: causes and implications. *J Health Serv Res Policy* 1996; **1**: 77–80.
- <sup>2</sup> McDonald A, Knight R, Campbell M *et al*. What influences recruitment to randomised controlled trials? A review of trials funded by two UK funding agencies. *Trials* 2006; **7**: 9.
- <sup>3</sup> Foy R, Parry J, Duggan A *et al*. How evidence based are recruitment strategies to randomized controlled trials in primary care? Experience from seven studies. *Fam Pract* 2003; **20**: 83–92.
- <sup>4</sup> Watson J, Torgerson D. Increasing recruitment to randomised trials: a review of randomised controlled trials. *BMC Med Res Methodol* 2006; **6**. doi:10.1186/1471-2288-6-34.
